## **Correction: Evidence of Differential HLA Class I-Mediated Viral Evolution in Functional and Accessory/Regulatory Genes of HIV-1**

Zabrina L. Brumme, Chanson J. Brumme, David Heckerman, Bette T. Korber, Marcus Daniels, Jonathan Carlson, Carl Kadie, Tanmoy Bhattacharya, Celia Chui, James Szinger, Theresa Mo, Robert S. Hogg, Julio S. G. Montaner, Nicole Frahm, Christian Brander, Bruce D. Walker, P. Richard Harrigan

Correction for:

Brumme ZL, Brumme CJ, Heckerman D, Korber BT, Daniels M, et al. (2007) Evidence of differential HLA class I-mediated viral evolution in functional and accessory/regulatory genes of HIV-1. *PLoS Pathog* 3(7): e94. doi:10.1371/journal.ppat.0030094

Coauthor Tanmoy Bhattacharya's affiliations were listed incorrectly. The correct affiliations are:

**5** Los Alamos National Laboratory, Los Alamos, New Mexico, United States of America,

**6** Santa Fe Institute, Santa Fe, New Mexico, United States of America

(The second affiliation was incorrectly listed as **7** Department of Computer Science and Engineering, University of Washington, Seattle, Washington, United States of America.)

This correction note may be found online at doi:10.1371/journal.ppat.0030121.

Received: July 6, 2007; Accepted: July 6, 2007; Published: August 31, 2007

Citation: (2007) Correction: Evidence of differential HLA class I-mediated viral evolution in functional and accessory/regulatory genes of HIV-1. *PLoS Pathog* 3(8): e121. doi:10.1371/journal.ppat.0030121
